# Supplementary figures and images for: Synthesis, crystal structure and magnetic behavior of a croconato bridged Cu(ii) complex: effect of C–H⋯O interaction in controlling the coordination bond formation in organic–inorganic hybrid
Source: Royal Society of Chemistry journal article supplement (doi:10.1039/b511251f), 2005-01-01

Supplementary Figure: Room temperature X-band solid-powder EPR spectrum for complex **1**

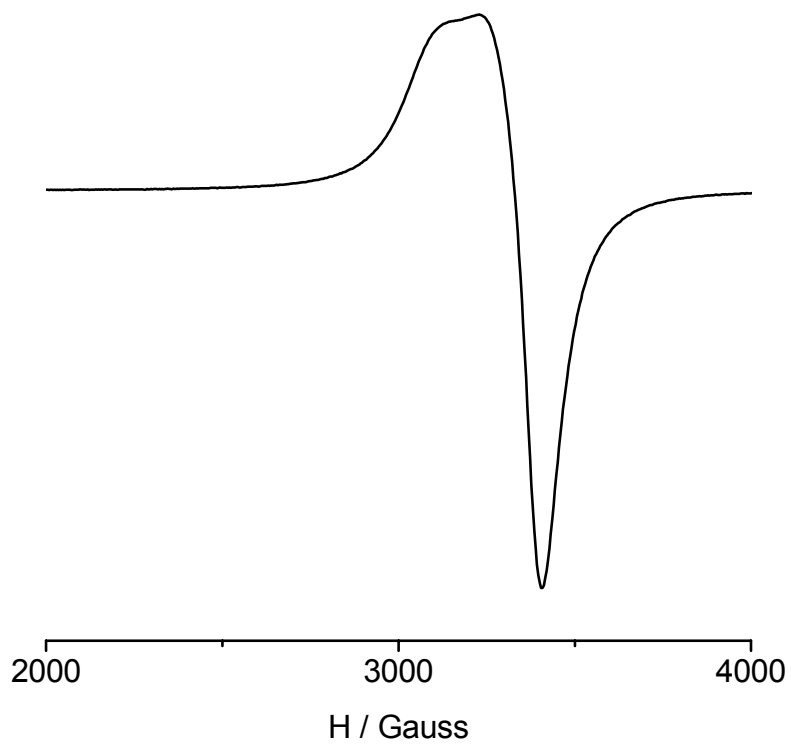

Supplement: b511251f.pdf [file b511251f.pdf]
